# Supplementary material
Source: MDPI journal article supplement (https://www.mdpi.com/2076-3417/10/3/1173)
Supplement: s1 [file s1]

## Supplementary materials

### Figure captions

**Figure S1.** Score images of the first ten PCs of spectral range 1 (502-947 nm) for tea samples from six different geographical origins. (a)-(j) represent PC1, PC2, ..., PC10. (The numbers 1, 2, 3, 4, 5 and 6 represent the corresponding geographical origin of Bashan Village, TongWu Village, Meijiawu Village, Tiedian Village, Xinxin Village and Hujialing Village)

**Figure S2.** Score images of the first ten PCs of spectral range 2 (975-1646 nm) for tea samples from six different geographical origins. (a)-(j) represent PC1, PC2, ..., PC10. (The numbers 1, 2, 3, 4, 5 and 6 represent the corresponding geographical origin of Bashan Village, TongWu Village, Meijiawu Village, Tiedian Village, Xinxin Village and Hujialing Village)

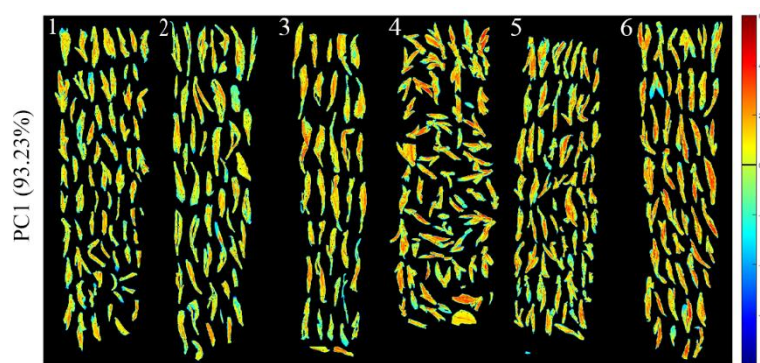

(a)

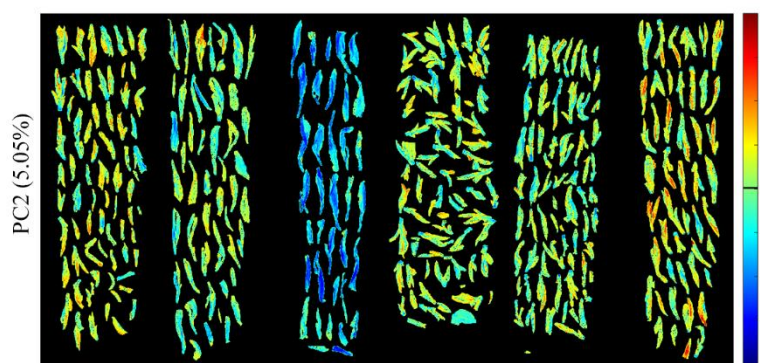

(b)

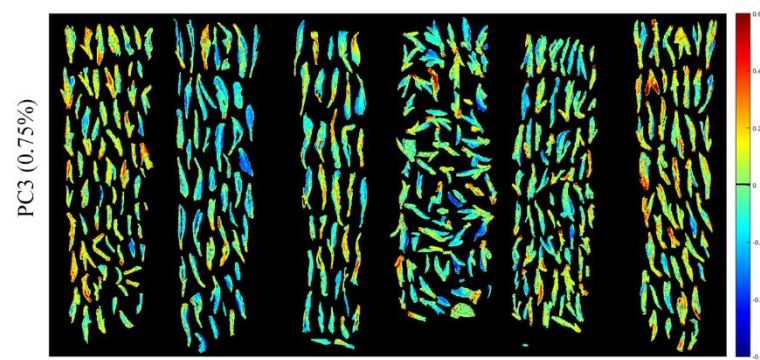

(c)

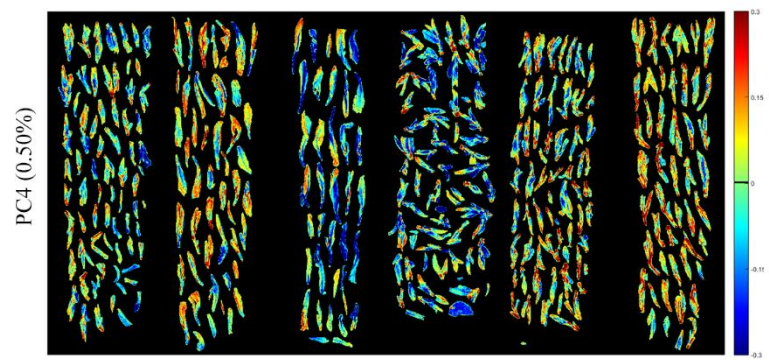

(d)

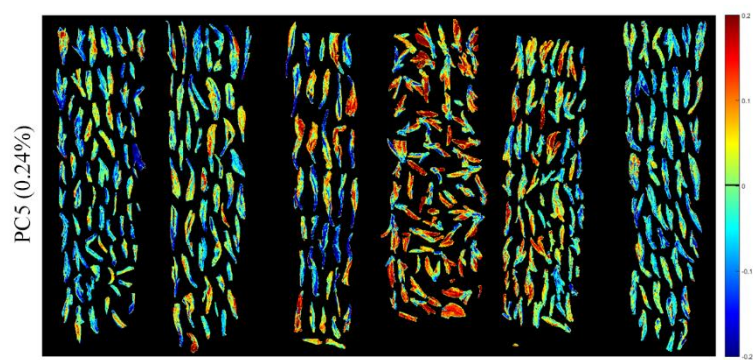

(e)

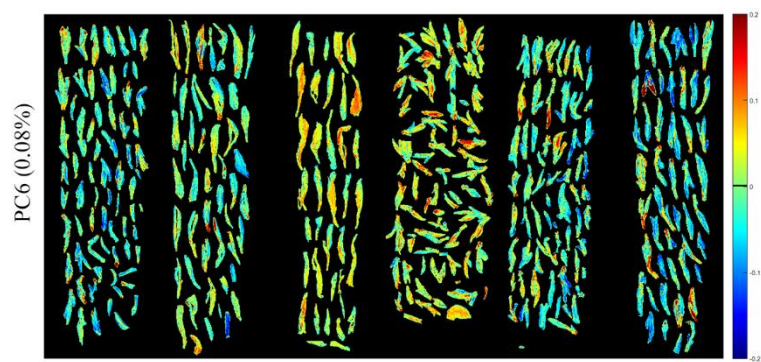

(f)

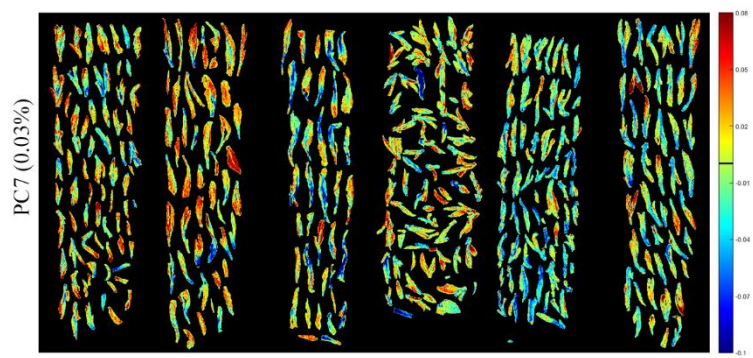

(g)



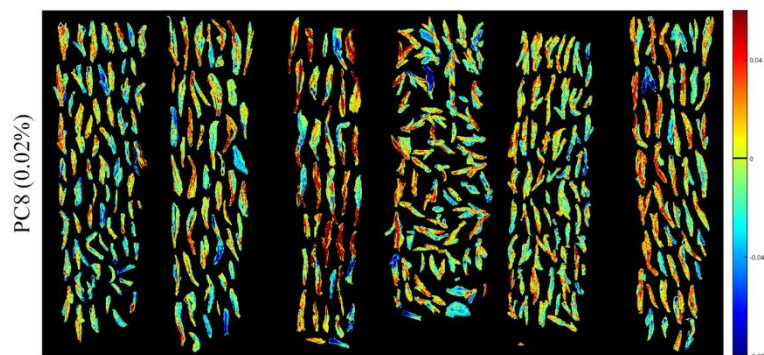

(h)

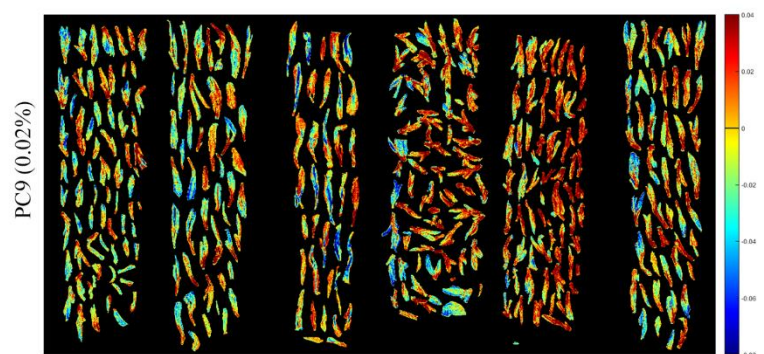

(i)

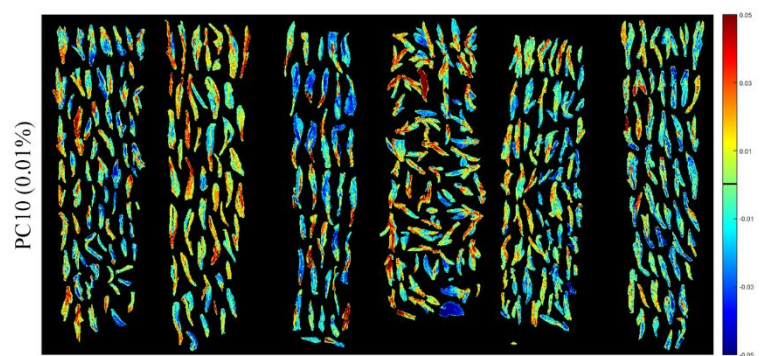

(j)

**Figure S1.** Scores of score images of the first ten PCs of spectral range 1 (502-947 nm) for tea samples from six different geographical origins. (a)-(j) represent PC1, PC2, ..., PC10. (The numbers 1, 2, 3, 4, 5 and 6 represent the corresponding geographical origin of Bashan Village, TongWu Village, Meijiawu Village, Tiedian Village, Xinxin Village and Hujialing Village)

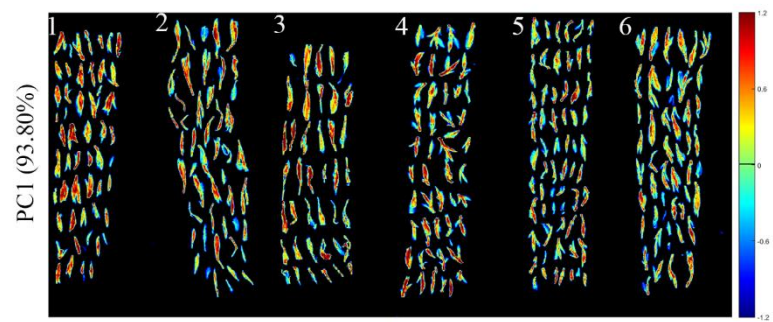

(a)

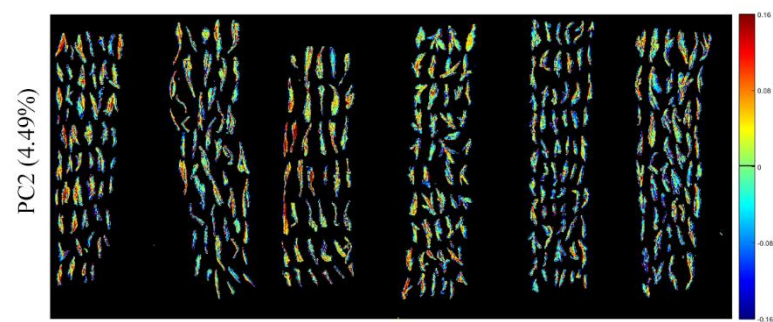

(b)

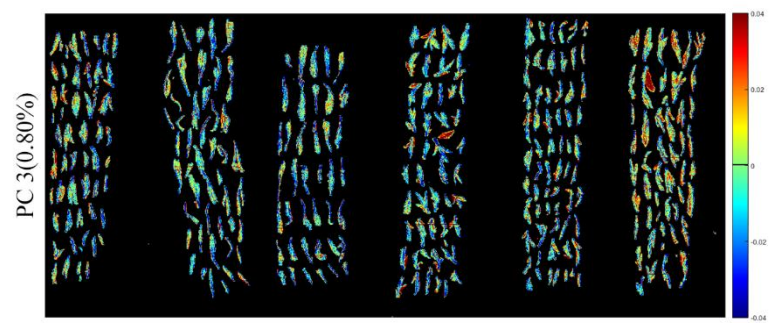

(c)

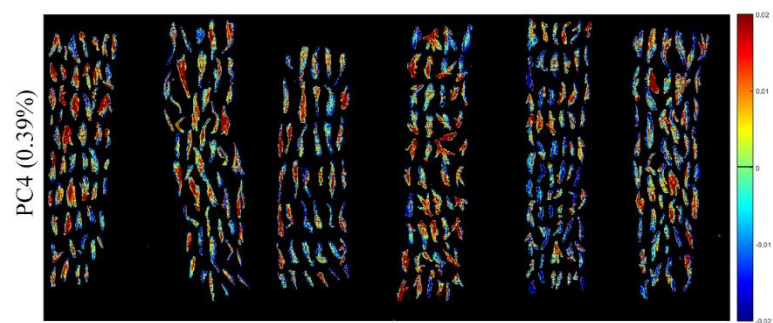

(d)

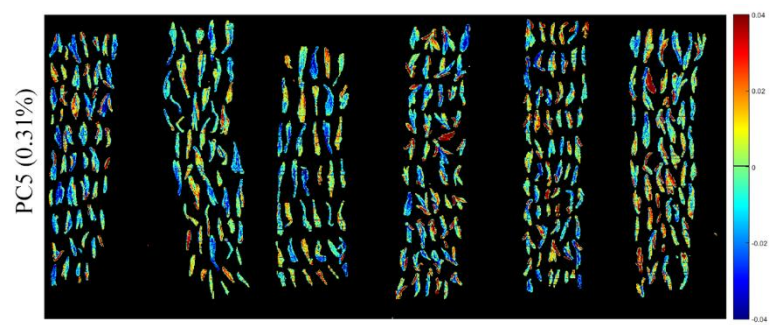

(e)

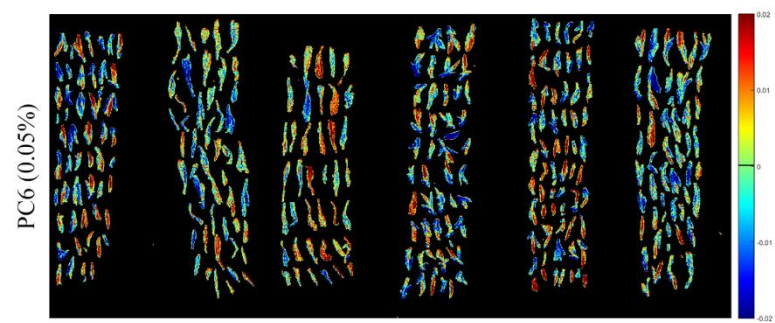

(f)

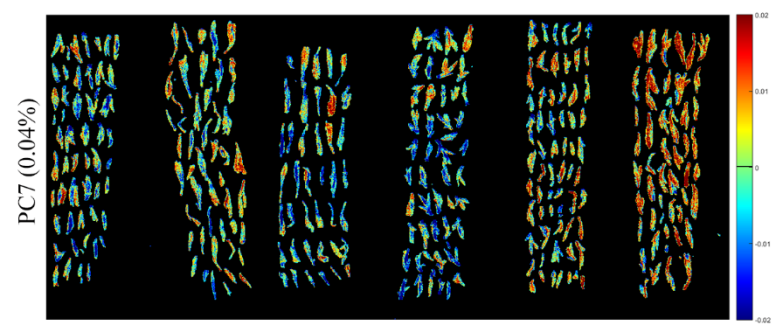

(g)

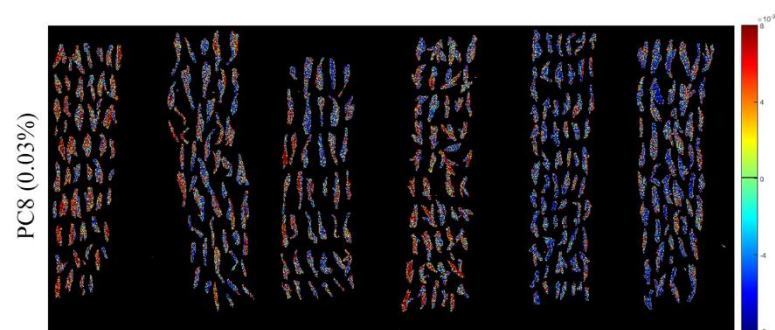

(h)

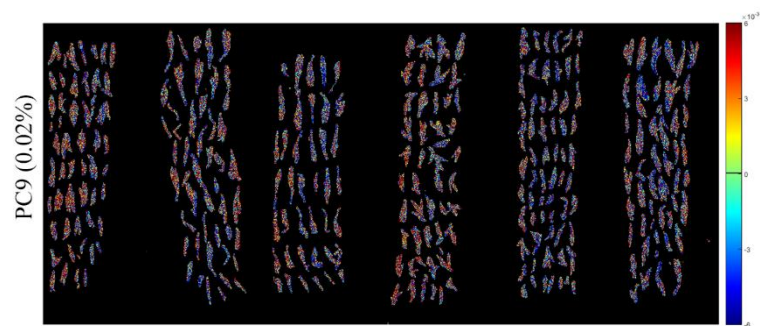

(i)

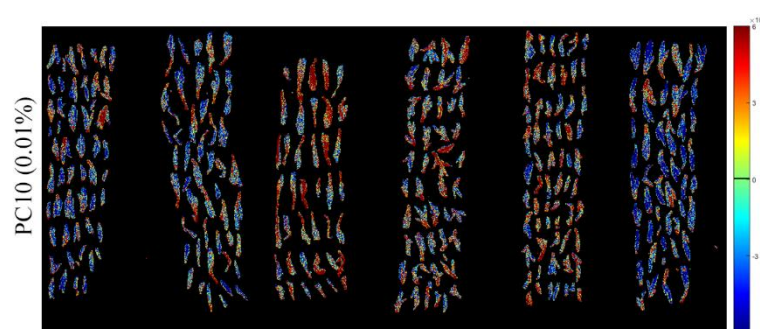

(j)

**Figure S2.** Score images of the first ten PCs of spectral range 2 (975-1646 nm) for tea samples from six different geographical origins. (a)-(j) represent PC1, PC2, ..., PC10. (The numbers 1, 2, 3, 4, 5 and 6 represent the corresponding geographical origin of Bashan Village, TongWu Village, Meijiawu Village, Tiedian Village, Xinxin Village and Hujialing Village)
